# Supplementary material for: A nanobody toolbox targeting dimeric coiled-coil modules for functionalization of designed protein origami structures
Source: PubMed Central journal article supplement (PMC8092592; doi:10.1073/pnas.2021899118), 2021-04-23

# Uncropped scans of the native PAGE gels from Fig. S9

## Uncropped scans of the native PAGE gels from Fig. S9A

Nb26, Nb49, Nb28, Nb30

Nb49, Nb28, Nb30

Nb28, Nb30

Nb26, Nb28, Nb30

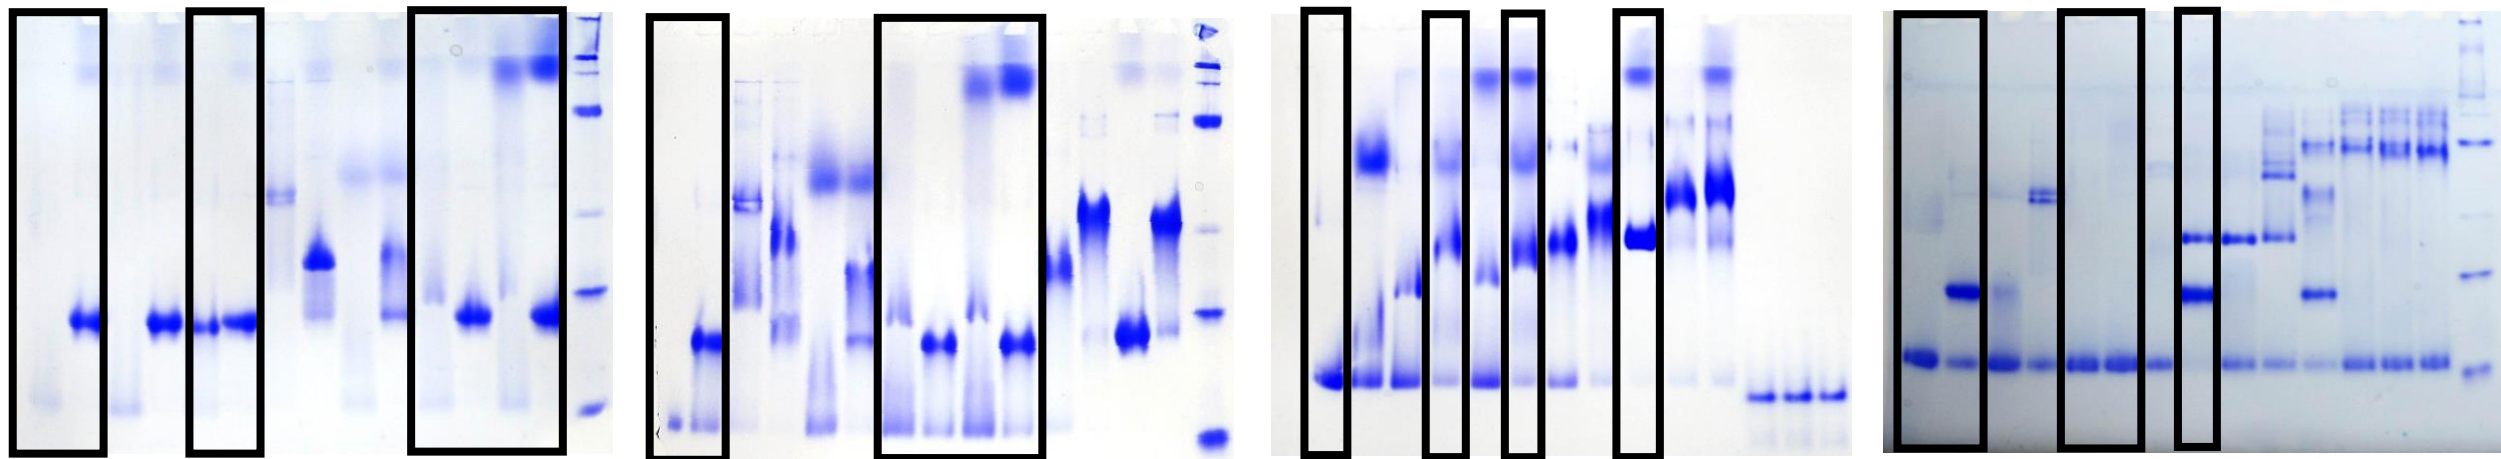

Uncropped scan of the native PAGE gel from Fig. S9B

Nb26, Nb13

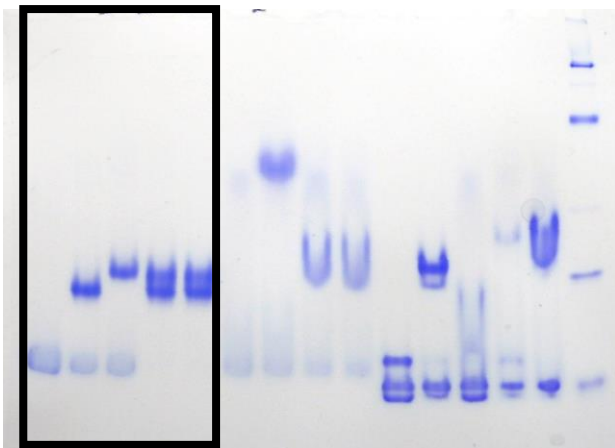

Uncropped scan of the native PAGE gel from Fig. S9C

Nb26, Nb15

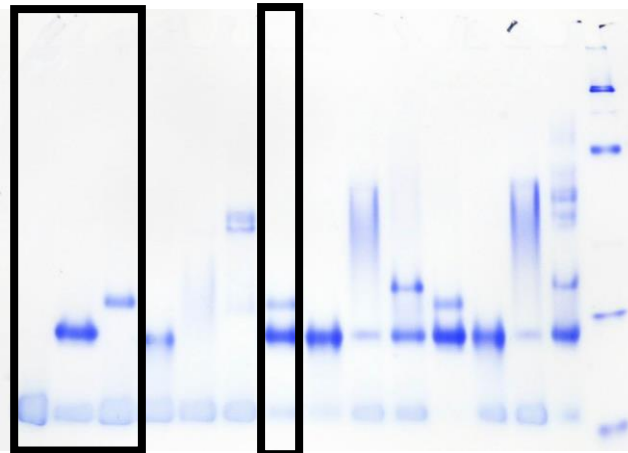

Uncropped scans of the native PAGE gel from Fig. S9D

Nb28, Nb30

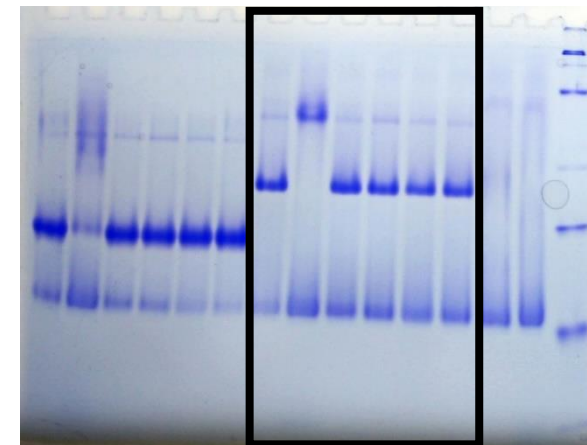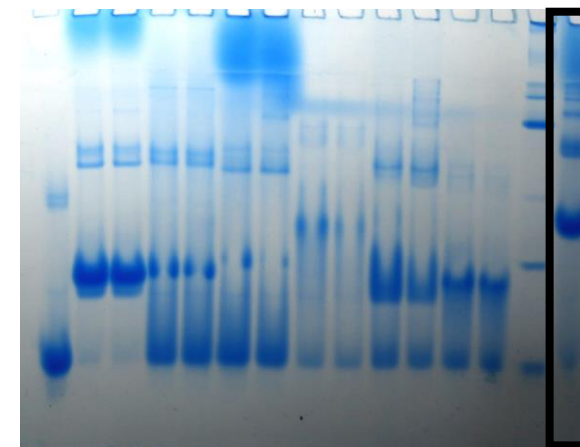

Supplement: pnas.2021899118.sd05.pdf [file pnas.2021899118.sd05.pdf]
